# Supplementary material for: Treatment of bipolar depression with minocycline and/or aspirin: an adaptive, 2×2 double-blind, randomized, placebo-controlled, phase IIA clinical trial
Source: PubMed Central journal article supplement (PMC5802452; doi:10.1038/s41398-017-0073-7), 2018-01-24
Supplement: 41398_2017_73_MOESM2_ESM.pdf [file 41398_2017_73_MOESM2_ESM.pdf]

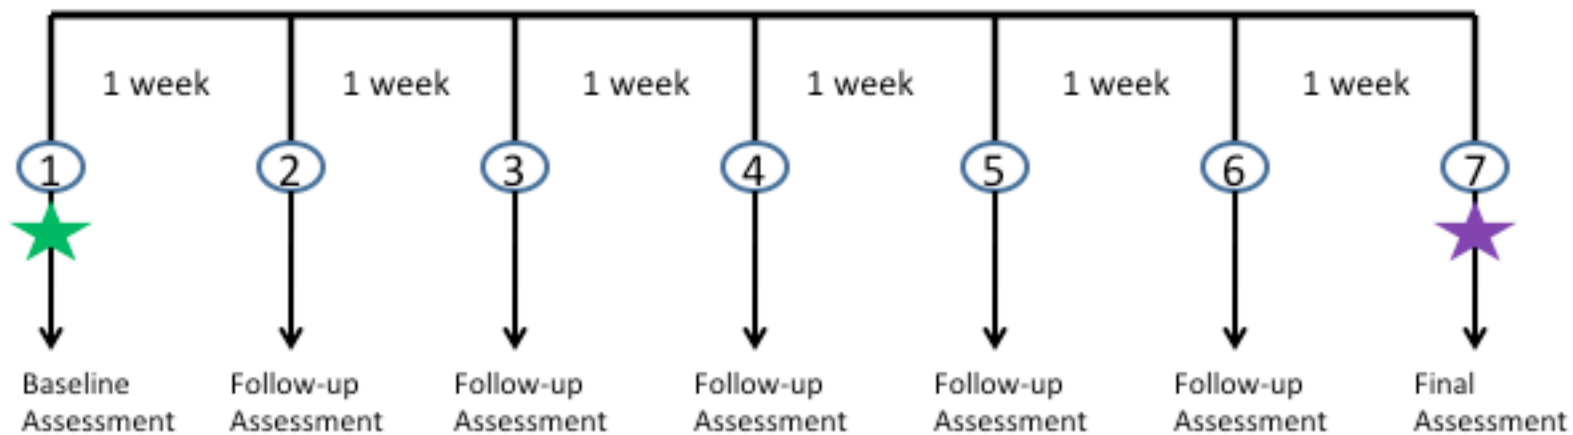

Minocycline  
dose initiation  
at 100mg bid

Aspirin dose  
initiation at  
81mg bid

Placebo  
initiated

Inflammation  
markers

Inflammation  
markers

Figure S1
